# Supplementary material for: A Synergism between Adaptive Effects and Evolvability Drives Whole Genome Duplication to Fixation
Source: PubMed Central journal article supplement (PMC3990473; doi:10.1371/journal.pcbi.1003547), 2014-04-17
Supplement: pcbi.1003547.s006.pdf [file pcbi.1003547.s006.pdf]

| level    | parameters   |             |            |          |          |
|----------|--------------|-------------|------------|----------|----------|
|          | permeability | degradation | conversion | X-target | A-target |
| standard | 0.1          | 1           | 4          | 1        | 1        |
| high     | 0.4          | 4           | 8          | 4        | 4        |
| low      | 0.05         | 0.5         | 2          | 0.25     | 0.25     |

Table 1: **Parameter values used in standard and changed environmental conditions.** The construction of the environmental change set is described in the Methods section.
